# Supplementary material for: Direct neural pathways convey distinct visual information to Drosophila mushroom bodies
Source: eLife journal article supplement (doi:10.7554/elife.14009), 2016-04-15

**A**

| Significance compared to the shi/+ control | Split-GAL4    | p65ADZp DNA fragment | ZpGdbd DNA fragment | KC yd | KC ymain | KC $\alpha'/\beta'$ ap | KC $\alpha'/\beta'$ m | KC $\alpha/\beta$ p | KC $\alpha/\beta$ s | KC $\alpha/\beta$ c |
|--------------------------------------------|---------------|----------------------|---------------------|-------|----------|------------------------|-----------------------|---------------------|---------------------|---------------------|
| **                                         | <b>MB010B</b> | R13F02               | R52H09              |       |          |                        |                       |                     |                     |                     |
| **                                         | <b>MB364B</b> | R13F02               | R21B06              |       |          |                        |                       |                     |                     |                     |
| **                                         | <b>MB419B</b> | R26E07               | R39A11              |       |          |                        |                       |                     |                     |                     |
| **                                         | <b>MB152B</b> | R19B03               | R26E07              |       |          |                        |                       |                     |                     |                     |
| **                                         | <b>MB009B</b> | R13F02               | R45H04              |       |          |                        |                       |                     |                     |                     |
| n.s.                                       | <b>MB417B</b> | R26E07               | R29G11              |       |          |                        |                       |                     |                     |                     |
| n.s.                                       | <b>MB008B</b> | R13F02               | R44E04              |       |          |                        |                       |                     |                     |                     |
| n.s.                                       | <b>MB185B</b> | R52H09               | R18F09              |       |          |                        |                       |                     |                     |                     |
| n.s.                                       | <b>MB131B</b> | R13F02               | R89B01              | †     |          |                        |                       |                     |                     |                     |
| n.s.                                       | <b>MB371B</b> | R13F02               | R85D07              |       |          |                        |                       |                     |                     |                     |
| n.s.                                       | <b>MB477B</b> | R44E04               | R26E07              |       |          |                        |                       |                     |                     |                     |
| n.s.                                       | <b>MB418B</b> | R26E07               | R30F02              |       |          |                        |                       |                     |                     |                     |
| n.s.                                       | <b>MB005B</b> | R13F02               | R34A03              |       |          |                        |                       |                     |                     |                     |
| n.s.                                       | <b>MB461B</b> | R35B12               | R26E07              |       |          |                        |                       |                     |                     |                     |
| n.s.                                       | <b>MB370B</b> | R13F02               | R41C07              |       |          |                        |                       |                     |                     |                     |

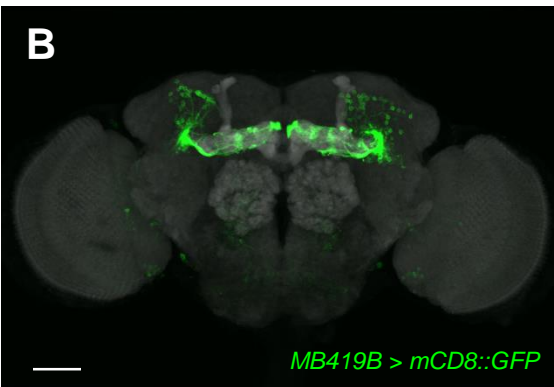

**C**

Visual conditioning

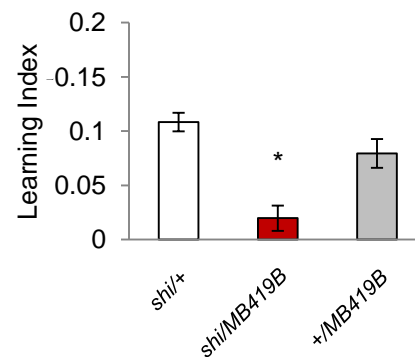

**D**

Olfactory conditioning

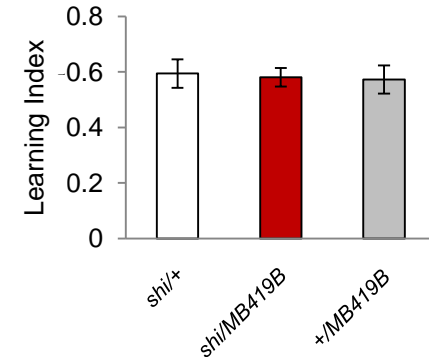

Supplement: supp [file elife-14009-supp-v1.zip]
