# Supplementary figures and images for: Direct neural pathways convey distinct visual information to Drosophila mushroom bodies
Source: eLife journal article supplement (doi:10.7554/elife.14009), 2016-04-15

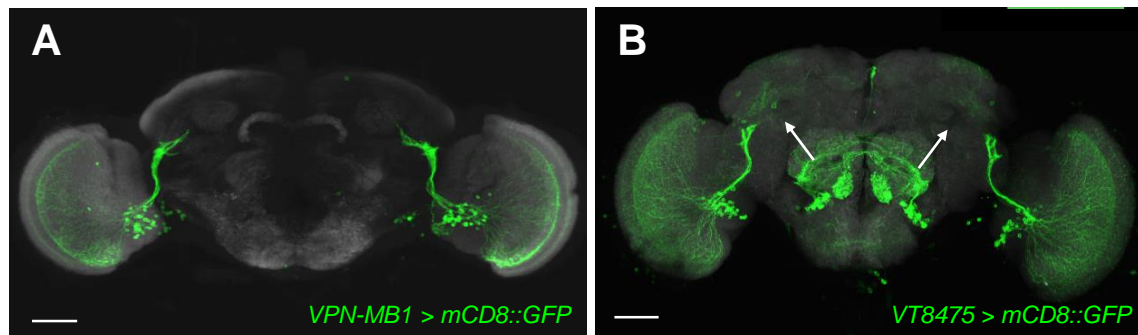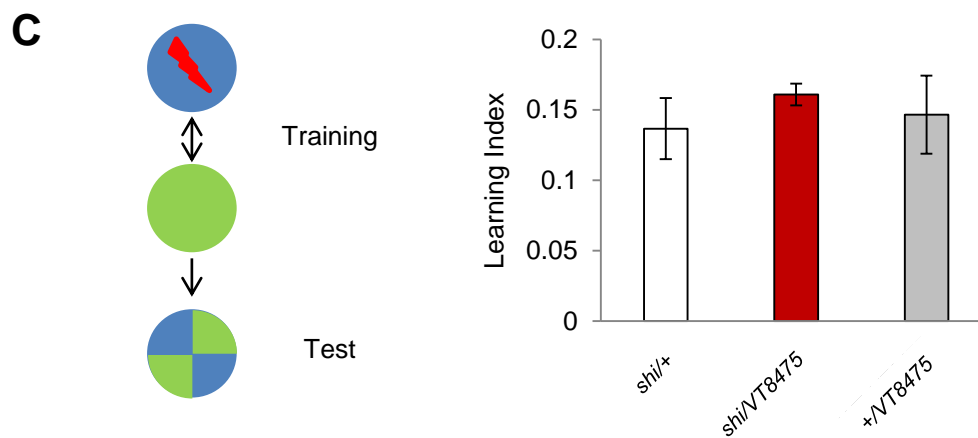

Supplement: supp [file elife-14009-supp-v1.zip]

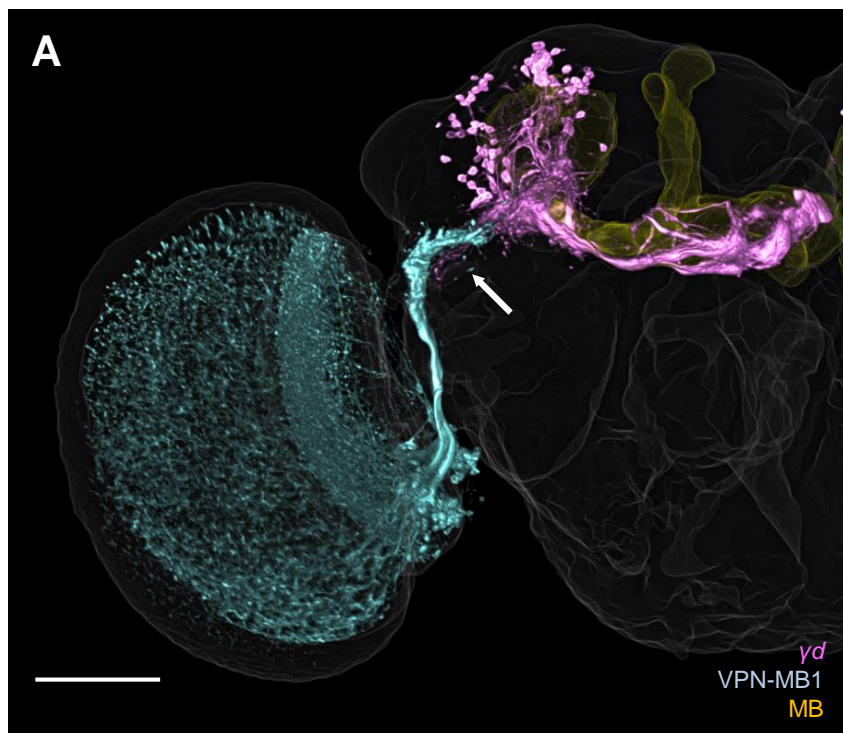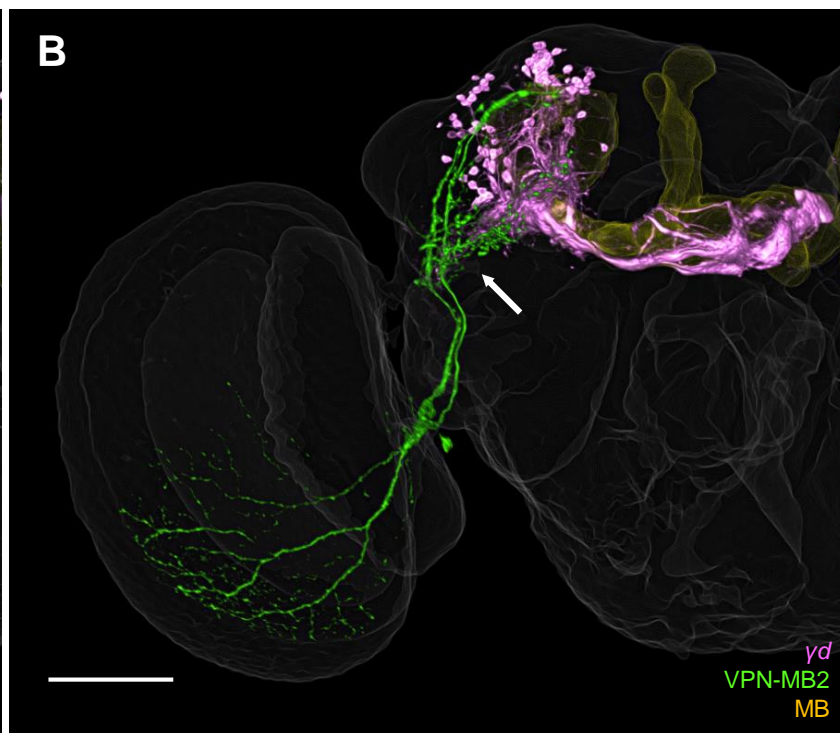

Supplement: supp [file elife-14009-supp-v1.zip]

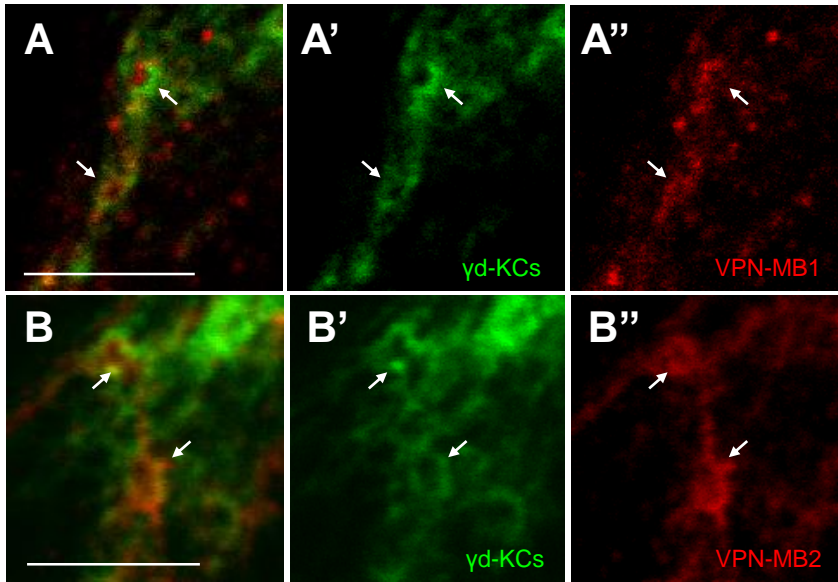

Supplement: supp [file elife-14009-supp-v1.zip]

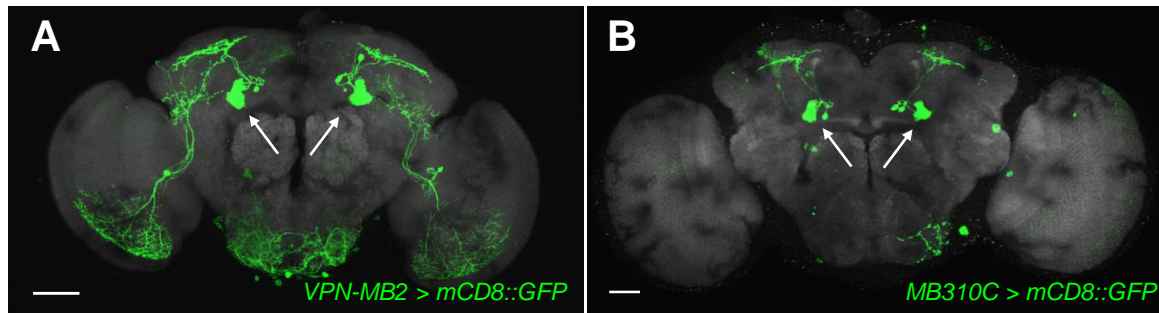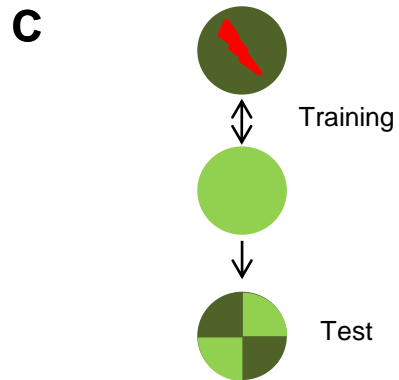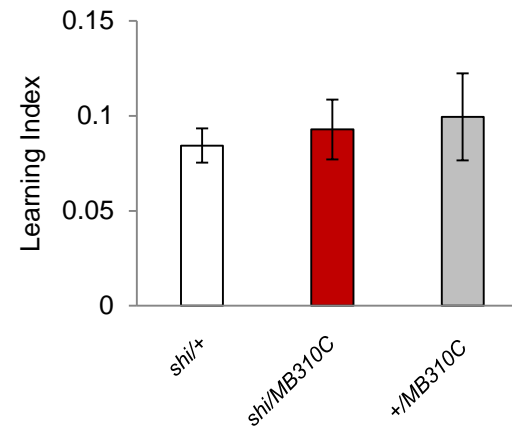

Supplement: supp [file elife-14009-supp-v1.zip]

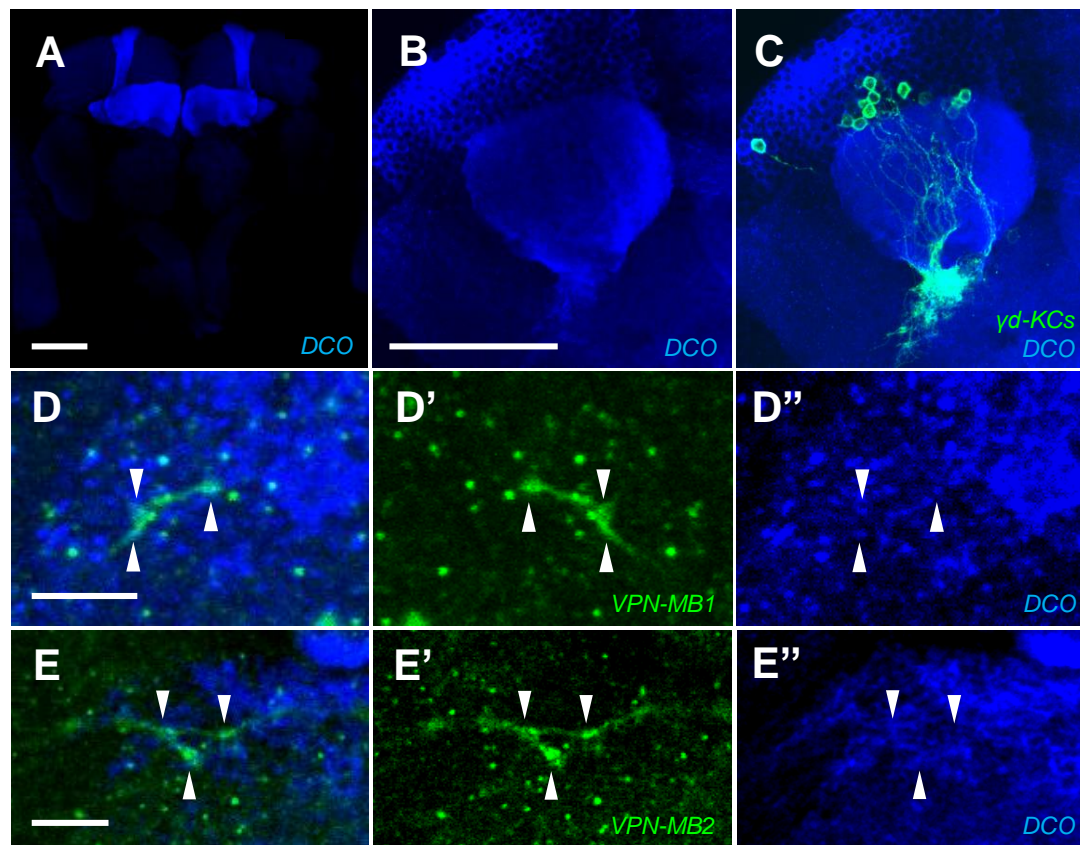

Supplement: supp [file elife-14009-supp-v1.zip]
